# Supplementary material
Source: publisher figshare collection journal article supplement (https://gsajournals.figshare.com/ndownloader/files/23662781)
Supplement: Supplementary file 1 [file 23662781]

## Sheet: Sheet1
Table S4. Proteasome subunit yeast:human orthologs and functional replacement results.
subunit identity	yeast gene	human ortholog	yeast::human gene replacement allele	human protein size (amino acid residues)	human protein comments	chromosomal replacement complementation result	diploid strains dissected	# of tetrads recovered with 4 viable spores	notes
core α1	SCL1	PSMA6	scl1::PSMA6 CCDS 9655.1	247	long isoform	yes	CMY 3494, 3644, 3660	3, 6, 5
core α2	PRE8	PSMA2	pre8::PSMA2 CCDS 5467.1	235		yes	CMY 3647, 3663	5, 5
core α3	PRE9	PSMA4	pre9::PSMA4 CCDS 10303.1-H240s	262		yes; normal growth rate and temperature-sensitivity	CMY 3491, CMY 3664	4, 5
core α3	PRE9	PSMA4	pre9::Δ24-PSMA4 CCDS 10303.1-L190s,H240s	238	24 N-terminal residue deletion	no; strong temperature-sensitivity	CMY 3648, 3491	4, 4
core α4	PRE6	PSMA7	pre6::PSMA7 CCDS 13489.1-G162s,R169s	249		yes, but slows growth	CMY 3788	23
core α4	PRE6	PSMA8	pre6::PSMA8 CCDS 45842.1	251	mid-length spermatoproteasome isoform	yes, but slows growth	CMY 3646, 3662, 3789	5, 5, 22
core α5	PUP2	PSMA5	pup2::PSMA5 CCDS 799.1-T87s	242	long isoform	yes	CMY 3493, 3650, 3666	7, 8, 9
core α6	PRE5	PSMA1	pre5::PSMA1 CCDS 7816.1	264	short isoform	yes	CMY 3661	5
core α7	PRE10	PSMA3	pre10::PSMA3 CCDS 45113.1	249	short isoform	no	CMY 3449, 3495	0
core α7	PRE10	PSMA3	pre10::PSMA3 CCDS 9731.1-A89s,R170s	256	long isoform	yes	CMY 3635, 3649, 3665	13, 3, 12
base of lid, ATPase 1	RPT1	PSMC2	rpt1::PSMC2 CCDS 5731.1-R312s	434		yes	CMY 3497	1	the human gene appears to compromise meiosis, but the cells are viable in mitosis
base of lid, ATPase 2	RPT2	PSMC1	rpt2::PSMC1 CCDS 32139.1-I115s	441		no	not analyzed by tetrad dissection	ND
base of lid, ATPase 3	RPT3	PSMC4	rpt3::PSMC4 CCDS 46076.1	388	short isoform	no	not analyzed by tetrad dissection	ND
base of lid, ATPase 3	RPT3	PSMC4	rpt3::PSMC4 CCDS 12547.1	419	long isoform	yes	not analyzed by tetrad dissection	ND
base of lid, ATPase 5	RPT5	PSMC3	rpt5::PSMC3 CCDS 7935.1	440		yes	not analyzed by tetrad dissection	ND
